# Supplementary material for: Snakebite incidence in two townships in Mandalay Division, Myanmar
Source: PubMed Central journal article supplement (PMC6053239; doi:10.1371/journal.pntd.0006643), 2018-07-09
Supplement: pntd.0006643.s001.pdf [file pntd.0006643.s001.pdf]

STROBE Statement for *cross-sectional studies*

Snakebite Incidence in Two Townships in Mandalay Division, Myanmar

|                           | Item No | Recommendation                                                                                                                                               |
|---------------------------|---------|--------------------------------------------------------------------------------------------------------------------------------------------------------------|
| <b>Title and abstract</b> | 1       | (a) Line 2<br>(b) Lines 30-54                                                                                                                                |
| <b>Introduction</b>       |         |                                                                                                                                                              |
| Background/rationale      | 2       | Lines 72-94                                                                                                                                                  |
| Objectives                | 3       | Lines 96-103                                                                                                                                                 |
| <b>Methods</b>            |         |                                                                                                                                                              |
| Study design              | 4       | Lines 106-107, 117-125                                                                                                                                       |
| Setting                   | 5       | Lines 117-121                                                                                                                                                |
| Participants              | 6       | Lines 121-125                                                                                                                                                |
| Variables                 | 7       | Lines 124-125, 139-142, 146-148                                                                                                                              |
| Data sources/ measurement | 8*      | Lines 127-128                                                                                                                                                |
| Bias                      | 9       | Lines 132-137, 150-154                                                                                                                                       |
| Study size                | 10      | Lines 127-130                                                                                                                                                |
| Quantitative variables    | 11      | Lines 154-157                                                                                                                                                |
| Statistical methods       | 12      | Lines 154-157<br>Analytical method for sampling strategy – line 155<br>Sub-groups and interactions – Not Applicable<br>Sensitivity Analysis – Not Applicable |
| <b>Results</b>            |         |                                                                                                                                                              |
| Participants              | 13*     | Lines 160-161                                                                                                                                                |
| Descriptive data          | 14*     | Lines 162-163                                                                                                                                                |
| Outcome data              | 15*     | NA                                                                                                                                                           |
| Main results              | 16      | Lines 165-204                                                                                                                                                |
| Other analyses            | 17      | NA                                                                                                                                                           |
| <b>Discussion</b>         |         |                                                                                                                                                              |
| Key results               | 18      | Lines 208-216, 218-221                                                                                                                                       |
| Limitations               | 19      | Lines 263-266                                                                                                                                                |
| Interpretation            | 20      | Lines 223-228, 230-238, 240-246                                                                                                                              |
| Generalisability          | 21      | Lines 219-220                                                                                                                                                |
| <b>Other information</b>  |         |                                                                                                                                                              |
| Funding                   | 22      | DFAT, Australia. Information provided in online submission system                                                                                            |

\*Give information separately for exposed and unexposed groups.

**Note:** An Explanation and Elaboration article discusses each checklist item and gives methodological background and published examples of transparent reporting. The STROBE checklist is best used in conjunction with this article (freely available on the Web sites of PLoS Medicine at <http://www.plosmedicine.org/>, Annals of Internal Medicine at <http://www.annals.org/>, and Epidemiology at <http://www.epidem.com/>). Information on the STROBE Initiative is available at [www.strobe-statement.org](http://www.strobe-statement.org).
